# Supplementary material for: Analysis of Gastric Body Microbiota by Pyrosequencing: Possible Role of Bacteria Other Than Helicobacter pylori in the Gastric Carcinogenesis
Source: PubMed Central journal article supplement — J Cancer Prev. 2017 Jun 30;22(2):115–25. doi: 10.15430/JCP.2017.22.2.115 (PMC5503224; doi:10.15430/jcp.2017.22.2.115), 2017-06-30
Supplement: jcp-22-115_suppl.1.pdf [file jcp-22-115_suppl.1.pdf]

**Table S1** Comparison of A+B group between antrum and body

| Species                                 | Antrum (%)                |                          |                           |                          | Body (%)                  |                          |                           |                          |
|-----------------------------------------|---------------------------|--------------------------|---------------------------|--------------------------|---------------------------|--------------------------|---------------------------|--------------------------|
|                                         | HP(-)<br>control<br>(n=2) | HP(-)<br>Cancer<br>(n=2) | HP(+)<br>control<br>(n=3) | HP(+)<br>Cancer<br>(n=5) | HP(-)<br>control<br>(n=2) | HP(-)<br>Cancer<br>(n=2) | HP(+)<br>control<br>(n=3) | HP(+)<br>Cancer<br>(n=5) |
| <i>Streptococcus pseudopneumoniae</i>   | 0.14                      | 18.68                    | 3.37                      | 6.04                     | 3.80                      | 23.11                    | 0.98                      | 0.20                     |
| <i>Streptococcus mitis</i>              | 0.02                      | 9.01                     | 0.51                      | 0.82                     | 0.45                      | 3.09                     | 0.23                      | 0.00                     |
| <i>Streptococcus salivarius</i>         | 0.01                      | 4.00                     | 0.11                      | 0.40                     | 0.27                      | 6.37                     | 0.03                      | 0.02                     |
| <i>Haemophilus parainfluenzae</i>       | 0.15                      | 3.84                     | 0.46                      | 0.96                     | 2.15                      | 2.41                     | 0.13                      | 0.02                     |
| <i>Streptococcus infantis</i>           | 0.32                      | 3.39                     | 0.24                      | 1.10                     | 3.07                      | 5.38                     | 0.08                      | 0.12                     |
| <i>Veillonella atypica</i>              | 0.03                      | 2.97                     | 0.23                      | 0.64                     | 0.32                      | 1.22                     | 0.03                      | 0.01                     |
| <i>Veillonella dispar</i>               | 0.03                      | 2.37                     | 0.18                      | 0.77                     | 0.53                      | 1.25                     | 0.05                      | 0.01                     |
| <i>Streptococcus australis</i>          | 0.05                      | 2.19                     | 0.14                      | 0.68                     | 0.59                      | 2.01                     | 0.10                      | 0.01                     |
| <i>Lactobacillus salivarius</i>         | 0.00                      | 1.93                     | 0.00                      | 0.05                     | 0.01                      | 0.67                     | 0.00                      | 0.00                     |
| <i>Streptococcus oralis</i>             | 0.02                      | 1.72                     | 0.14                      | 0.30                     | 0.50                      | 2.07                     | 0.08                      | 0.01                     |
| <i>Haemophilus paraphrohaemolyticus</i> | 0.00                      | 1.60                     | 0.08                      | 0.60                     | 0.03                      | 1.10                     | 0.02                      | 0.01                     |
| <i>Streptococcus parasanguinis</i>      | 0.14                      | 1.51                     | 0.27                      | 0.60                     | 0.86                      | 3.36                     | 0.14                      | 0.04                     |
| <i>Actinomyces odontolyticus</i>        | 0.05                      | 1.31                     | 0.17                      | 0.89                     | 0.44                      | 0.95                     | 0.12                      | 0.03                     |
| <i>Streptococcus_uc</i>                 | 0.10                      | 1.14                     | 0.20                      | 0.65                     | 0.76                      | 2.96                     | 0.06                      | 0.06                     |
| <i>Streptococcus tigurinus</i>          | 0.01                      | 1.06                     | 0.03                      | 0.17                     | 0.25                      | 0.43                     | 0.00                      | 0.00                     |
| <i>Haemophilus_uc</i>                   | 0.00                      | 1.00                     | 0.07                      | 0.11                     | 0.09                      | 0.86                     | 0.04                      | 0.00                     |
| <i>Streptococcus lactarius</i>          | 0.02                      | 0.88                     | 0.05                      | 0.08                     | 0.14                      | 0.65                     | 0.02                      | 0.00                     |
| <i>Haemophilus haemolyticus</i>         | 0.00                      | 0.61                     | 0.10                      | 0.04                     | 0.04                      | 0.53                     | 0.04                      | 0.00                     |
| <i>Streptococcus gordonii</i>           | 0.00                      | 0.52                     | 0.02                      | 0.04                     | 0.01                      | 0.36                     | 0.02                      | 0.00                     |
| <i>Streptococcus cristatus</i>          | 0.02                      | 0.49                     | 0.03                      | 0.20                     | 0.19                      | 0.39                     | 0.04                      | 0.00                     |
| <i>Haemophilus influenzae</i>           | 0.00                      | 0.43                     | 0.02                      | 0.03                     | 0.00                      | 0.41                     | 0.00                      | 0.00                     |
| <i>Actinomyces_uc</i>                   | 0.01                      | 0.38                     | 0.02                      | 0.12                     | 0.25                      | 0.59                     | 0.03                      | 0.01                     |
| <i>Actinomyces meyeri</i>               | 0.02                      | 0.38                     | 0.06                      | 0.11                     | 0.15                      | 0.47                     | 0.02                      | 0.01                     |
| <i>Veillonella rodentium</i>            | 0.00                      | 0.34                     | 0.00                      | 0.00                     | 0.00                      | 0.02                     | 0.00                      | 0.00                     |
| <i>Lactobacillus_uc</i>                 | 0.00                      | 0.34                     | 0.00                      | 0.05                     | 0.00                      | 0.28                     | 0.00                      | 0.00                     |
| <i>Enterococcus hirae</i>               | 0.00                      | 0.26                     | 0.00                      | 0.00                     | 0.00                      | 0.01                     | 0.00                      | 0.00                     |
| <i>Lactobacillus fermentum</i>          | 0.00                      | 0.21                     | 0.00                      | 0.00                     | 0.00                      | 0.08                     | 0.00                      | 0.03                     |
| <i>Streptococcus peroris</i>            | 0.01                      | 0.18                     | 0.00                      | 0.01                     | 0.04                      | 0.37                     | 0.03                      | 0.00                     |
| <i>Veillonella parvula</i>              | 0.01                      | 0.17                     | 0.00                      | 0.01                     | 0.01                      | 0.03                     | 0.00                      | 0.00                     |
| <i>Atopobium parvulum</i>               | 0.03                      | 0.16                     | 0.08                      | 0.08                     | 0.04                      | 0.21                     | 0.00                      | 0.00                     |
| <i>Streptococcus anginosus</i>          | 0.01                      | 0.16                     | 0.00                      | 0.03                     | 0.14                      | 0.21                     | 0.02                      | 0.00                     |
| <i>Enterococcus_uc</i>                  | 0.00                      | 0.14                     | 0.00                      | 0.00                     | 0.00                      | 0.00                     | 0.00                      | 0.00                     |
| <i>Lactobacillus crispatus</i>          | 0.00                      | 0.14                     | 0.00                      | 0.19                     | 0.01                      | 0.05                     | 0.00                      | 0.16                     |
| <i>Streptococcus sanguinis</i>          | 0.03                      | 0.13                     | 0.01                      | 0.10                     | 0.27                      | 0.22                     | 0.02                      | 0.01                     |
| <i>Haemophilus quentini</i>             | 0.00                      | 0.13                     | 0.00                      | 0.01                     | 0.01                      | 0.08                     | 0.00                      | 0.00                     |
| <i>Actinomyces graevenitzii</i>         | 0.00                      | 0.12                     | 0.03                      | 0.08                     | 0.03                      | 0.03                     | 0.00                      | 0.02                     |
| <i>Eubacterium sulci</i>                | 0.00                      | 0.11                     | 0.04                      | 0.13                     | 0.08                      | 0.04                     | 0.00                      | 0.00                     |
| <i>Helicobacter pylori</i>              | 0.11                      | 0.11                     | 86.47                     | 60.30                    | 0.42                      | 0.10                     | 89.78                     | 75.93                    |
| <i>Veillonella_uc</i>                   | 0.00                      | 0.08                     | 0.02                      | 0.04                     | 0.04                      | 0.17                     | 0.00                      | 0.01                     |
| <i>Streptococcus constellatus</i>       | 0.01                      | 0.08                     | 0.13                      | 0.05                     | 0.04                      | 0.07                     | 0.45                      | 0.04                     |
| <i>Klebsiella pneumoniae</i>            | 0.00                      | 0.07                     | 0.00                      | 1.05                     | 0.00                      | 0.02                     | 0.00                      | 0.03                     |
| <i>Enterococcus faecium</i>             | 0.00                      | 0.05                     | 0.00                      | 0.00                     | 0.00                      | 0.00                     | 0.00                      | 0.00                     |
| <i>Lactobacillus vaginalis</i>          | 0.00                      | 0.05                     | 0.00                      | 0.03                     | 0.00                      | 0.01                     | 0.00                      | 0.02                     |
| <i>Staphylococcus epidermidis</i>       | 0.08                      | 0.04                     | 0.05                      | 0.47                     | 0.01                      | 0.01                     | 0.00                      | 0.03                     |
| <i>Lactobacillus ultimus</i>            | 0.00                      | 0.04                     | 0.00                      | 0.09                     | 0.00                      | 0.01                     | 0.00                      | 0.07                     |
| <i>Enterobacter aerogenes</i>           | 0.00                      | 0.03                     | 0.00                      | 0.00                     | 0.00                      | 0.00                     | 0.00                      | 0.01                     |
| <i>Lactobacillus reuteri</i>            | 0.00                      | 0.03                     | 0.00                      | 0.00                     | 0.00                      | 0.00                     | 0.00                      | 0.00                     |
| <i>Streptococcus mutans</i>             | 0.00                      | 0.03                     | 0.00                      | 0.00                     | 0.00                      | 0.02                     | 0.00                      | 0.00                     |
| <i>Haemophilus pittmaniae</i>           | 0.00                      | 0.03                     | 0.00                      | 0.00                     | 0.00                      | 0.01                     | 0.00                      | 0.00                     |
| <i>Veillonella rogosae</i>              | 0.00                      | 0.03                     | 0.01                      | 0.01                     | 0.01                      | 0.03                     | 0.02                      | 0.00                     |
| <i>Actinomyces oris</i>                 | 0.00                      | 0.03                     | 0.00                      | 0.01                     | 0.02                      | 0.03                     | 0.00                      | 0.01                     |
| <i>Lactobacillus gasseri</i>            | 0.00                      | 0.03                     | 0.00                      | 0.02                     | 0.00                      | 0.01                     | 0.00                      | 0.01                     |
| <i>Eubacterium infirmum</i>             | 0.00                      | 0.03                     | 0.01                      | 0.01                     | 0.01                      | 0.02                     | 0.00                      | 0.00                     |
| <i>Lactobacillus johnsonii</i>          | 0.00                      | 0.03                     | 0.00                      | 0.00                     | 0.00                      | 0.00                     | 0.00                      | 0.00                     |
| <i>Actinomyces viscosus</i>             | 0.00                      | 0.02                     | 0.00                      | 0.00                     | 0.00                      | 0.07                     | 0.00                      | 0.00                     |
| <i>Atopobium_uc</i>                     | 0.00                      | 0.02                     | 0.00                      | 0.00                     | 0.03                      | 0.01                     | 0.00                      | 0.00                     |
| <i>Streptococcus dentirousetti</i>      | 0.00                      | 0.02                     | 0.00                      | 0.00                     | 0.00                      | 0.00                     | 0.00                      | 0.00                     |
| <i>Streptococcus sobrinus</i>           | 0.00                      | 0.02                     | 0.00                      | 0.00                     | 0.00                      | 0.07                     | 0.00                      | 0.00                     |
| <i>Atopobium rimae</i>                  | 0.02                      | 0.02                     | 0.00                      | 0.00                     | 0.16                      | 0.02                     | 0.02                      | 0.00                     |
| <i>Haemophilus aegyptius</i>            | 0.01                      | 0.02                     | 0.00                      | 0.00                     | 0.01                      | 0.01                     | 0.00                      | 0.00                     |
| <i>Actinomyces turicensis</i>           | 0.00                      | 0.01                     | 0.00                      | 0.00                     | 0.00                      | 0.00                     | 0.00                      | 0.00                     |
| <i>Citrobacter rodentium</i>            | 0.00                      | 0.01                     | 0.00                      | 0.00                     | 0.00                      | 0.00                     | 0.00                      | 0.00                     |
| <i>Eubacterium brachy</i>               | 0.01                      | 0.01                     | 0.01                      | 0.00                     | 0.02                      | 0.01                     | 0.00                      | 0.00                     |
| <i>Staphylococcus hominis</i>           | 0.00                      | 0.01                     | 0.00                      | 0.01                     | 0.04                      | 0.03                     | 0.00                      | 0.03                     |
| <i>Streptococcus pneumoniae</i>         | 0.01                      | 0.01                     | 0.20                      | 0.01                     | 0.02                      | 0.02                     | 0.13                      | 0.00                     |
| <i>Actinomyces cardiffensis</i>         | 0.07                      | 0.00                     | 0.00                      | 0.00                     | 0.39                      | 0.00                     | 0.00                      | 0.00                     |
| <i>Actinomyces johnsonii</i>            | 0.00                      | 0.00                     | 0.00                      | 0.00                     | 0.02                      | 0.00                     | 0.00                      | 0.00                     |

|                                         |      |      |      |      |      |      |      |      |
|-----------------------------------------|------|------|------|------|------|------|------|------|
| <i>Actinomyces naeslundii</i>           | 0.00 | 0.00 | 0.00 | 0.00 | 0.01 | 0.00 | 0.00 | 0.00 |
| <i>Citrobacter farmeri</i>              | 0.00 | 0.00 | 0.00 | 0.02 | 0.00 | 0.00 | 0.00 | 0.00 |
| <i>Citrobacter freundii</i>             | 0.00 | 0.00 | 0.00 | 0.00 | 0.01 | 0.00 | 0.00 | 0.00 |
| <i>Citrobacter_uc</i>                   | 0.00 | 0.00 | 0.00 | 0.01 | 0.00 | 0.00 | 0.00 | 0.02 |
| <i>Clostridium bifermentans</i>         | 0.00 | 0.00 | 0.02 | 0.00 | 0.00 | 0.00 | 0.00 | 0.00 |
| <i>Clostridium perfringens</i>          | 0.00 | 0.00 | 0.01 | 0.00 | 0.00 | 0.00 | 0.00 | 0.00 |
| <i>Clostridium_g4_uc</i>                | 0.00 | 0.00 | 0.00 | 0.00 | 0.01 | 0.00 | 0.00 | 0.00 |
| <i>Corynebacterium accolens</i>         | 0.00 | 0.00 | 0.00 | 0.01 | 0.00 | 0.00 | 0.00 | 0.00 |
| <i>Corynebacterium afermentans</i>      | 0.00 | 0.00 | 0.00 | 0.00 | 0.00 | 0.00 | 0.00 | 0.00 |
| <i>Corynebacterium amycolatatum</i>     | 0.00 | 0.00 | 0.00 | 0.03 | 0.00 | 0.00 | 0.00 | 0.00 |
| <i>Corynebacterium doosanense</i>       | 0.00 | 0.00 | 0.00 | 0.00 | 0.00 | 0.00 | 0.00 | 0.01 |
| <i>Corynebacterium durum</i>            | 0.00 | 0.00 | 0.00 | 0.00 | 0.02 | 0.00 | 0.01 | 0.00 |
| <i>Corynebacterium kroppenstedtii</i>   | 0.01 | 0.00 | 0.00 | 0.00 | 0.00 | 0.00 | 0.00 | 0.00 |
| <i>Corynebacterium matruchotii</i>      | 0.00 | 0.00 | 0.01 | 0.00 | 0.00 | 0.03 | 0.00 | 0.00 |
| <i>Corynebacterium pseudogenitalium</i> | 0.02 | 0.00 | 0.00 | 0.06 | 0.01 | 0.04 | 0.00 | 0.01 |
| <i>Corynebacterium vitaeruminis</i>     | 0.00 | 0.00 | 0.00 | 0.00 | 0.01 | 0.02 | 0.00 | 0.00 |
| <i>Corynebacterium_uc</i>               | 0.00 | 0.00 | 0.01 | 0.00 | 0.07 | 0.01 | 0.00 | 0.00 |
| <i>Enterobacter asburiae</i>            | 0.00 | 0.00 | 0.00 | 0.01 | 0.00 | 0.00 | 0.00 | 0.00 |
| <i>Enterobacter cowanii</i>             | 0.01 | 0.00 | 0.00 | 0.13 | 0.00 | 0.00 | 0.00 | 0.00 |
| <i>Enterobacter hormaechei</i>          | 0.00 | 0.00 | 0.00 | 0.06 | 0.00 | 0.00 | 0.00 | 0.00 |
| <i>Enterobacter mori</i>                | 0.00 | 0.00 | 0.00 | 0.00 | 0.01 | 0.02 | 0.00 | 0.00 |
| <i>Enterobacter_uc</i>                  | 0.00 | 0.00 | 0.00 | 0.01 | 0.03 | 0.00 | 0.00 | 0.01 |
| <i>Eubacterium hadrum</i>               | 0.00 | 0.00 | 0.00 | 0.00 | 0.03 | 0.00 | 0.00 | 0.00 |
| <i>Eubacterium yurii</i>                | 0.00 | 0.00 | 0.00 | 0.00 | 0.01 | 0.00 | 0.00 | 0.00 |
| <i>Eubacterium_g10_uc</i>               | 0.00 | 0.00 | 0.00 | 0.01 | 0.01 | 0.02 | 0.00 | 0.00 |
| <i>Haemophilus sputorum</i>             | 0.00 | 0.00 | 0.00 | 0.00 | 0.03 | 0.05 | 0.00 | 0.00 |
| <i>Haemophilus_g1_uc</i>                | 0.00 | 0.00 | 0.00 | 0.00 | 0.00 | 0.06 | 0.00 | 0.00 |
| <i>Haemophilus_g2_uc</i>                | 0.00 | 0.00 | 0.00 | 0.00 | 0.00 | 0.02 | 0.00 | 0.00 |
| <i>Klebsiella granulomatis</i>          | 0.00 | 0.00 | 0.00 | 0.00 | 0.00 | 0.00 | 0.00 | 0.00 |
| <i>Klebsiella singaporensis</i>         | 0.00 | 0.00 | 0.00 | 0.01 | 0.00 | 0.00 | 0.00 | 0.00 |
| <i>Klebsiella variicola</i>             | 0.00 | 0.00 | 0.00 | 0.01 | 0.00 | 0.00 | 0.00 | 0.01 |
| <i>Klebsiella_uc</i>                    | 0.00 | 0.00 | 0.00 | 0.01 | 0.00 | 0.00 | 0.00 | 0.00 |
| <i>Lactobacillus antri</i>              | 0.00 | 0.00 | 0.00 | 0.01 | 0.00 | 0.00 | 0.00 | 0.00 |
| <i>Lactobacillus coleohominis</i>       | 0.00 | 0.00 | 0.00 | 0.00 | 0.00 | 0.00 | 0.00 | 0.00 |
| <i>Lactobacillus graminis</i>           | 0.01 | 0.00 | 0.00 | 0.00 | 0.00 | 0.00 | 0.00 | 0.00 |
| <i>Lactobacillus helveticus</i>         | 0.00 | 0.00 | 0.02 | 0.01 | 0.00 | 0.00 | 0.00 | 0.00 |
| <i>Lactobacillus iners</i>              | 0.00 | 0.00 | 0.00 | 0.00 | 0.01 | 0.00 | 0.00 | 0.03 |
| <i>Lactobacillus kitasatonis</i>        | 0.00 | 0.00 | 0.00 | 0.00 | 0.00 | 0.01 | 0.00 | 0.00 |
| <i>Lactobacillus mucosae</i>            | 0.00 | 0.00 | 0.00 | 0.13 | 0.00 | 0.00 | 0.00 | 0.00 |
| <i>Lactobacillus oris</i>               | 0.00 | 0.00 | 0.00 | 0.01 | 0.00 | 0.01 | 0.00 | 0.00 |
| <i>Lactobacillus paracasei</i>          | 0.00 | 0.00 | 0.00 | 0.00 | 0.00 | 0.01 | 0.00 | 0.00 |
| <i>Lactococcus lactis</i>               | 0.00 | 0.00 | 0.00 | 0.00 | 0.01 | 0.00 | 0.00 | 0.06 |
| <i>Mycobacterium abscessus</i>          | 0.05 | 0.00 | 0.00 | 0.00 | 0.00 | 0.00 | 0.00 | 0.00 |
| <i>Mycobacterium franklinii</i>         | 0.01 | 0.00 | 0.00 | 0.00 | 0.00 | 0.00 | 0.00 | 0.00 |
| <i>Staphylococcus aureus</i>            | 0.00 | 0.00 | 0.00 | 0.00 | 0.01 | 0.00 | 0.00 | 0.00 |
| <i>Staphylococcus capitis</i>           | 0.00 | 0.00 | 0.00 | 0.01 | 0.00 | 0.00 | 0.00 | 0.00 |
| <i>Staphylococcus caprae</i>            | 0.01 | 0.00 | 0.00 | 0.04 | 0.02 | 0.01 | 0.00 | 0.02 |
| <i>Staphylococcus saprophyticus</i>     | 0.01 | 0.00 | 0.00 | 0.00 | 0.01 | 0.00 | 0.00 | 0.00 |
| <i>Staphylococcus warneri</i>           | 0.00 | 0.00 | 0.00 | 0.05 | 0.00 | 0.00 | 0.00 | 0.01 |
| <i>Staphylococcus_uc</i>                | 0.00 | 0.00 | 0.01 | 0.01 | 0.00 | 0.00 | 0.00 | 0.00 |
| <i>Streptococcus downei</i>             | 0.00 | 0.00 | 0.00 | 0.01 | 0.00 | 0.01 | 0.00 | 0.00 |
| <i>Streptococcus intermedius</i>        | 0.05 | 0.00 | 0.00 | 0.00 | 0.28 | 0.00 | 0.00 | 0.00 |
| <i>Streptococcus vestibularis</i>       | 0.00 | 0.00 | 0.02 | 0.00 | 0.00 | 0.00 | 0.00 | 0.00 |
| <i>Veillonella denticariosi</i>         | 0.00 | 0.00 | 0.00 | 0.01 | 0.00 | 0.01 | 0.00 | 0.00 |
| <i>Veillonella tobetsuensis</i>         | 0.00 | 0.00 | 0.00 | 0.00 | 0.00 | 0.02 | 0.00 | 0.00 |

Values are expressed as mean percent
