# Supplementary material for: Analysis of Gastric Body Microbiota by Pyrosequencing: Possible Role of Bacteria Other Than Helicobacter pylori in the Gastric Carcinogenesis
Source: PubMed Central journal article supplement — J Cancer Prev. 2017 Jun 30;22(2):115–25. doi: 10.15430/JCP.2017.22.2.115 (PMC5503224; doi:10.15430/jcp.2017.22.2.115), 2017-06-30
Supplement: jcp-22-115_suppl.2.pdf [file jcp-22-115_suppl.2.pdf]

|                                            |       |       |       |       |       |       |       |       |
|--------------------------------------------|-------|-------|-------|-------|-------|-------|-------|-------|
| <i>Leuconostoc mesenteroides</i> group     | 0.000 | 0.000 | 0.000 | 0.000 | 0.000 | 0.000 | 0.000 | 0.018 |
| <i>Leuconostoc pseudomesenteroides</i>     | 0.000 | 0.000 | 0.000 | 0.000 | 0.030 | 0.000 | 0.000 | 0.000 |
| <i>Methylobacterium aerolatum</i>          | 0.000 | 0.000 | 0.000 | 0.000 | 0.000 | 0.000 | 0.000 | 0.006 |
| <i>Methylobacterium aminovorans</i>        | 0.000 | 0.000 | 0.000 | 0.000 | 0.000 | 0.011 | 0.000 | 0.000 |
| <i>Methylobacterium aquaticum</i>          | 0.029 | 0.000 | 0.000 | 0.000 | 0.000 | 0.000 | 0.000 | 0.000 |
| <i>Methylobacterium gnaphalii</i>          | 0.000 | 0.000 | 0.000 | 0.004 | 0.000 | 0.000 | 0.000 | 0.000 |
| <i>Methylobacterium komagatae</i>          | 0.006 | 0.000 | 0.000 | 0.000 | 0.000 | 0.000 | 0.004 | 0.000 |
| <i>Methylobacterium longum</i>             | 0.000 | 0.000 | 0.000 | 0.000 | 1.906 | 0.088 | 0.057 | 0.405 |
| <i>Methylobacterium organophilum</i>       | 0.000 | 0.000 | 0.000 | 0.000 | 0.059 | 0.011 | 0.000 | 0.000 |
| <i>Methylobacterium oryzae</i>             | 0.000 | 0.000 | 0.000 | 0.000 | 0.000 | 0.000 | 0.000 | 0.060 |
| <i>Methylobacterium persicinum</i>         | 0.006 | 0.000 | 0.000 | 0.000 | 0.000 | 0.011 | 0.000 | 0.018 |
| <i>Methylobacterium platani</i>            | 0.000 | 0.000 | 0.000 | 0.000 | 0.000 | 0.000 | 0.000 | 0.006 |
| <i>Methylobacterium radiotolerans</i>      | 0.006 | 0.000 | 0.000 | 0.000 | 3.080 | 0.183 | 0.105 | 0.623 |
| <i>Methylobacterium salsuginis</i>         | 0.000 | 0.000 | 0.000 | 0.000 | 0.000 | 0.027 | 0.000 | 0.006 |
| <i>Methylobacterium tardum</i>             | 0.000 | 0.000 | 0.000 | 0.000 | 0.038 | 0.019 | 0.000 | 0.018 |
| <i>Methylobacterium zatmanii</i>           | 0.034 | 0.000 | 0.000 | 0.000 | 0.000 | 0.000 | 0.014 | 0.002 |
| <i>Mycobacterium abscessus</i>             | 0.054 | 0.000 | 0.000 | 0.000 | 0.000 | 0.000 | 0.000 | 0.000 |
| <i>Mycobacterium austroafricanum</i> group | 0.000 | 0.000 | 0.000 | 0.000 | 0.009 | 0.000 | 0.000 | 0.000 |
| <i>Mycobacterium franklinii</i>            | 0.012 | 0.000 | 0.000 | 0.000 | 0.000 | 0.000 | 0.000 | 0.000 |
| <i>Mycobacterium gadium</i>                | 0.000 | 0.000 | 0.000 | 0.000 | 0.000 | 0.000 | 0.004 | 0.000 |
| <i>Nocardioides alkalitolerans</i>         | 0.000 | 0.000 | 0.000 | 0.000 | 0.000 | 0.000 | 0.000 | 0.006 |
| <i>Nocardioides hwasunensis</i>            | 0.000 | 0.000 | 0.000 | 0.000 | 0.000 | 0.000 | 0.000 | 0.003 |
| <i>Nocardioides_uc</i>                     | 0.000 | 0.000 | 0.000 | 0.002 | 0.000 | 0.000 | 0.000 | 0.000 |
| <i>Novosphingobium lentum</i>              | 0.000 | 0.000 | 0.000 | 0.000 | 0.000 | 0.011 | 0.000 | 0.000 |
| <i>Novosphingobium soli</i>                | 0.000 | 0.000 | 0.000 | 0.000 | 0.000 | 0.000 | 0.004 | 0.003 |
| <i>Novosphingobium stygium</i>             | 0.000 | 0.000 | 0.022 | 0.000 | 0.000 | 0.000 | 0.000 | 0.000 |
| <i>Novosphingobium_uc</i>                  | 0.000 | 0.000 | 0.000 | 0.004 | 0.000 | 0.011 | 0.000 | 0.000 |
| <i>Paenibacillaceae_uc_s</i>               | 0.000 | 0.000 | 0.011 | 0.000 | 0.000 | 0.000 | 0.000 | 0.000 |
| <i>Porphyromonas gingivalis</i>            | 0.034 | 0.000 | 0.016 | 0.014 | 0.377 | 0.000 | 0.000 | 0.000 |
| <i>Pseudomonas entomophila</i>             | 0.000 | 0.000 | 0.000 | 0.013 | 0.030 | 0.000 | 0.000 | 0.000 |
| <i>Pseudomonas stutzeri</i>                | 0.000 | 0.000 | 0.000 | 0.011 | 0.030 | 0.000 | 0.000 | 0.000 |
| <i>Rhizobium leguminosarum</i>             | 0.000 | 0.000 | 0.000 | 0.000 | 0.030 | 0.000 | 0.019 | 0.012 |
| <i>Rhizobium tropici</i>                   | 0.000 | 0.000 | 0.000 | 0.000 | 0.030 | 0.000 | 0.000 | 0.001 |
| <i>Sphingobium ummariense</i>              | 0.000 | 0.000 | 0.000 | 0.000 | 0.000 | 0.011 | 0.000 | 0.000 |
| <i>Sphingobium_uc</i>                      | 0.000 | 0.000 | 0.000 | 0.000 | 0.000 | 0.000 | 0.000 | 0.006 |
| <i>Staphylococcus aureus</i>               | 0.000 | 0.000 | 0.000 | 0.000 | 0.009 | 0.000 | 0.000 | 0.000 |
| <i>Staphylococcus saprophyticus</i>        | 0.006 | 0.000 | 0.000 | 0.000 | 0.009 | 0.000 | 0.000 | 0.000 |
| <i>Variovorax paradoxus</i>                | 0.066 | 0.000 | 0.000 | 0.000 | 0.000 | 0.000 | 0.000 | 0.000 |

Values are expressed as mean percent
